# Supplementary material for: The retromer complex regulates C. elegans development and mammalian ciliogenesis
Source: Oxford University Press journal article supplement (doi:10.1242/jcs.259396), 2022-05-05
Supplement: jcs259396supp.pdf [file jcs259396supp.pdf]

## Supplemental Fig. 1

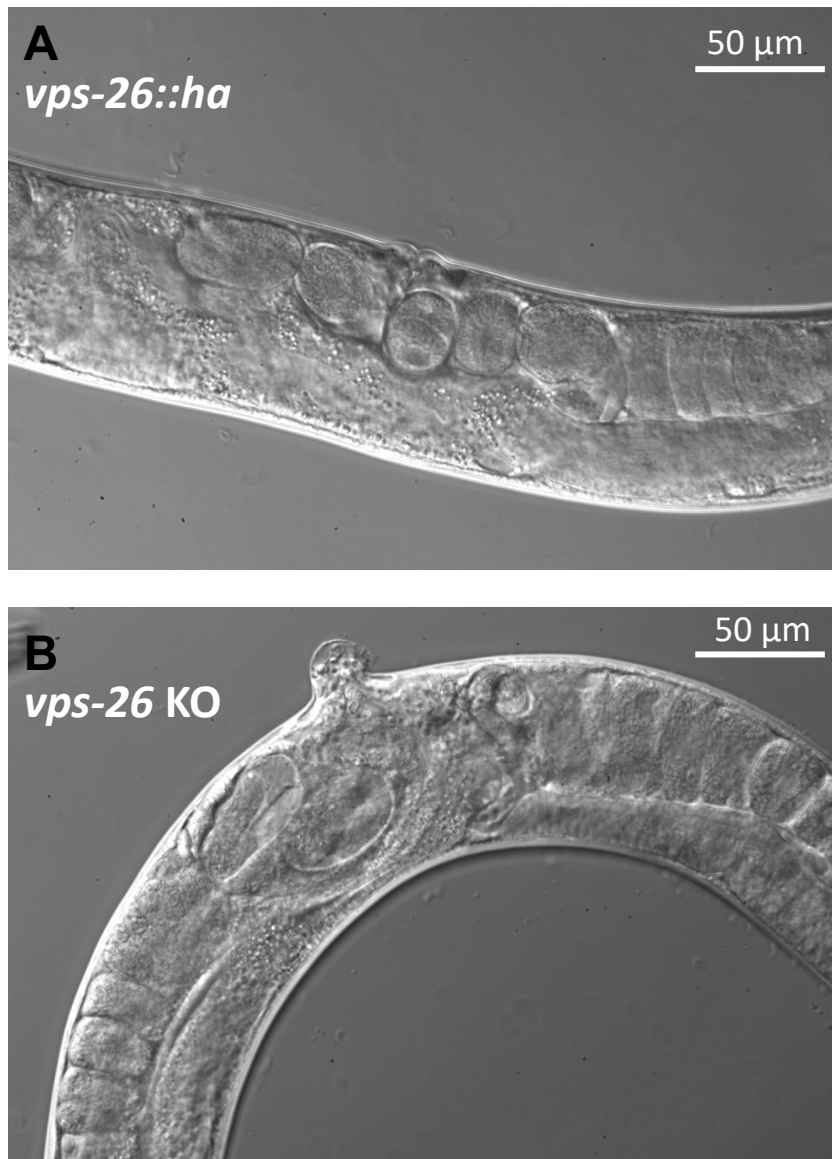

**Fig. S1. Effect of *vps-26* knockout on vulva development in adult worms.** (A) A representative DIC image of a normal adult *vps-26::ha* vulva. (B) A representative DIC image of an abnormal protruding vulva that is often seen in *vps-26* knockout worms.

## Supplemental Fig. 2

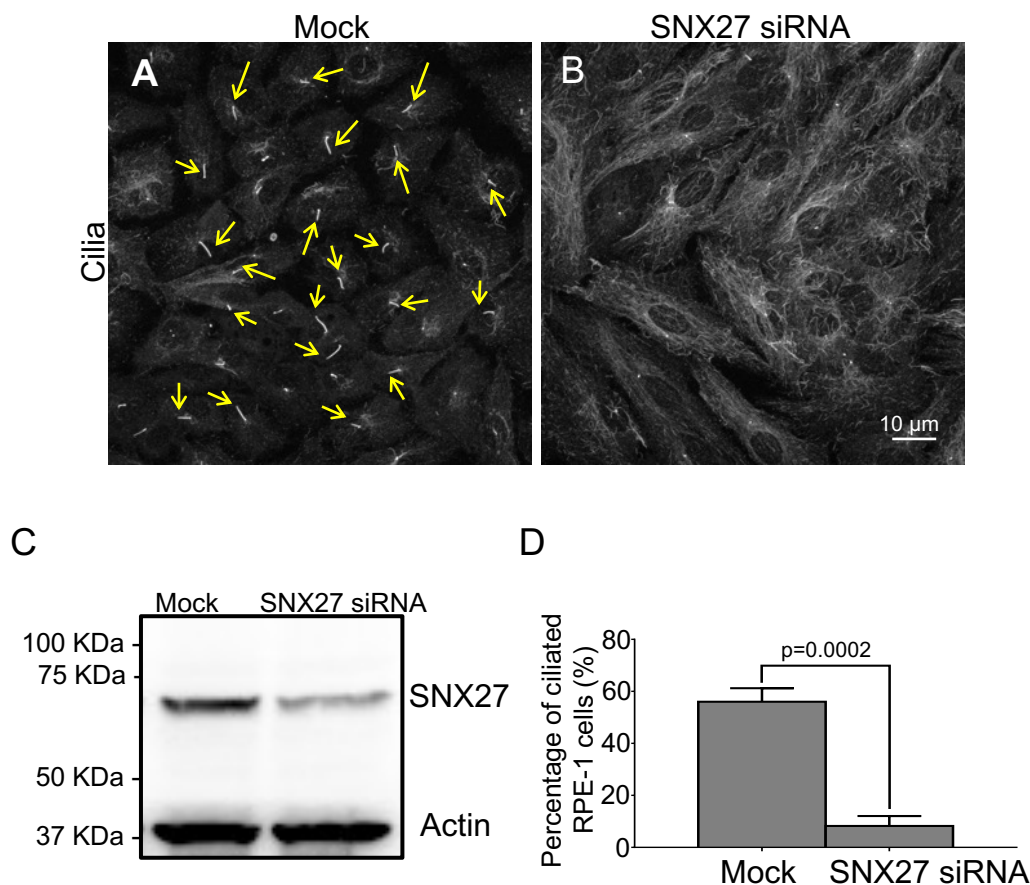

**Fig. S2. SNX27 is required for normal ciliogenesis.** (A-D) RPE-1 cells were Mock-treated (A) or SNX27-siRNA-treated (B) for 48 h, and serum-starved for 24 h to induce ciliogenesis. Cells were then fixed and immunostained with acetylated-tubulin to identify cilia/centrioles. Compared to Mock-treated cells (A), fewer cilia were generated upon depletion of SNX27 (B). (C) SNX27 siRNA-depletion efficacy was determined by immunoblotting. (D) The percentages of ciliated RPE-1 cells from either Mock- or siRNA-treated cover-slips were quantified and presented as a bar graph. The p-value was calculated for comparison between Mock- and siRNA-treated cells; n=3 experiments (>100 cells quantified for each experiment). Error bars denote standard deviation.

## Supplemental Fig. 3

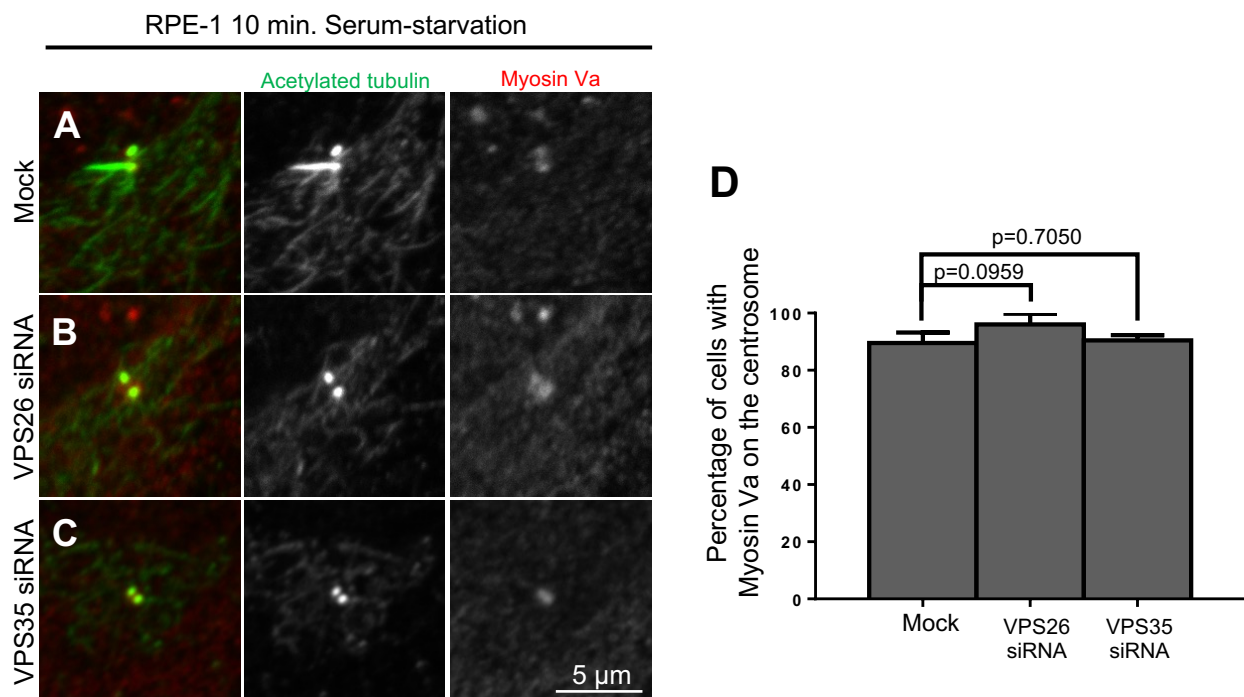

**Fig. S3. Recruitment of preciliary vesicles to the centrosome is independent of the retromer.** (A-D) RPE-1 cells were Mock-treated (A), VPS26-siRNA-treated (B), or VPS35-siRNA-treated (C), and serum-starved for 10 min to induce ciliogenesis. Immunoblots demonstrating siRNA depletion of these proteins is shown in Fig. 6. Cells were then fixed and immunostained with antibodies to acetylated-tubulin (green) to identify cilia/centrioles and Myosin Va (red) to mark preciliary vesicles. Myosin Va was detected on the centrosome in (A) Mock-treated, (B) VPS26-depleted and (C) VPS35-depleted cells. (D) The bar graph indicates the percentage of cells showing recruitment of Myosin Va onto cilia/centrioles.  $n=3$  experiments ( $>100$  cells quantified for each experiment). Error bars denote standard deviation.

## Supplemental Fig. 4

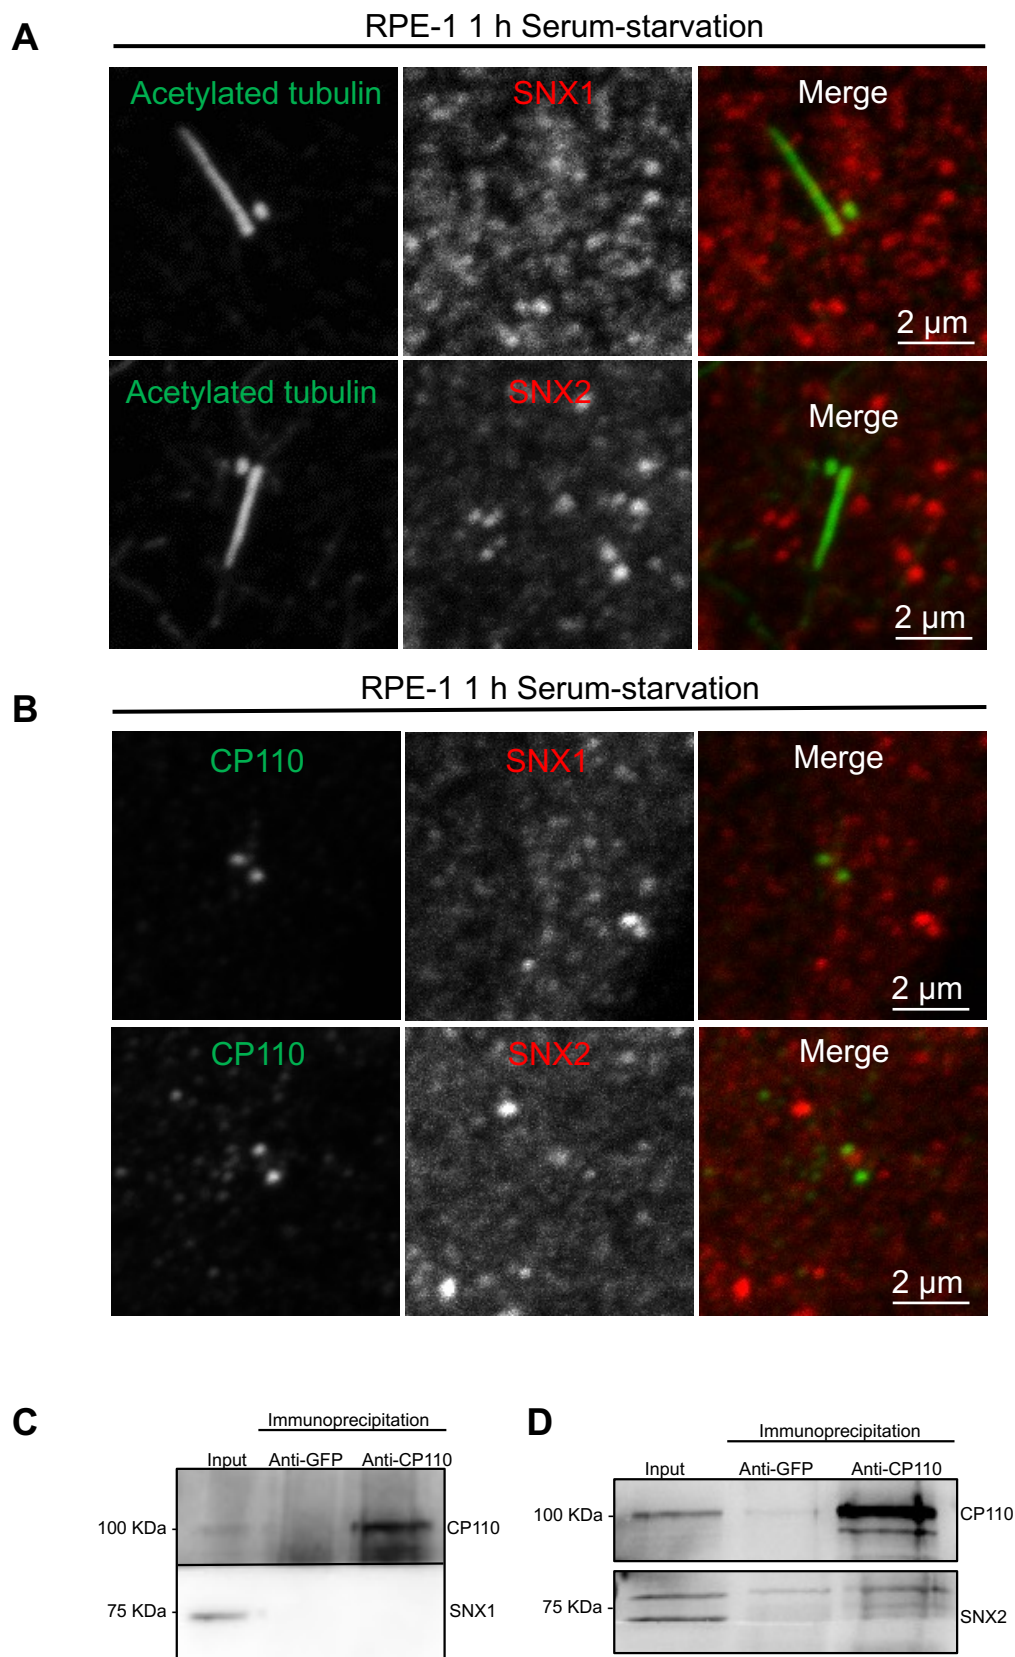

**Fig. S4. SNX1 and SNX2 display minimal co-localization with cilia/basal bodies or CP110.** (A) RPE-1 cells were fixed and immunostained using anti-acetylated-tubulin antibodies (green) and anti-SNX1 or anti-SNX2 antibodies (red). (B) RPE-1 cells were fixed and immunostained using anti-CP110 antibodies (green) and anti-SNX1 or anti-SNX2 antibodies (red). Immunofluorescence images were obtained by confocal microscopy. (C-D) Lack of CP110 co-immunoprecipitation with SNX1 and SNX2. RPE-1 cell lysates were subjected to immunoblotting (Input) or immunoprecipitation using anti-CP110 antibodies or rabbit anti-GFP antibodies (negative control). Immunoprecipitated proteins were immunoblotted with anti-CP110 (C and D), anti-SNX1 (C), and anti-SNX2 antibodies (D).

**Table S1.**

| STRAIN | GENOTYPE                                            | METHOD   | RESOURCE           |
|--------|-----------------------------------------------------|----------|--------------------|
| N2     | WT                                                  | N/A      | CGC                |
| IYR010 | <i>vps-26(luv10[vps-26::ha]) IV</i>                 | CRISPR   | This study         |
| IYR021 | <i>vps-26(luv21) IV</i>                             | CRISPR   | This study         |
| PY6100 | <i>oyIs59 Is[osm-6p::gfp] III</i>                   | N/A      | Piali Sengupta Lab |
| IYR025 | <i>oyIs59 Is[osm-6p::gfp] III; vps-26(luv21) IV</i> | Crossing | This study         |

**Table S2.**

| Gene                                 | Type of oligo                    | Sequence (5' to 3')                                                                                                    |
|--------------------------------------|----------------------------------|------------------------------------------------------------------------------------------------------------------------|
| <i>dpy-10</i> (Paix et al, 2015)     | co-CRISPR crRNA                  | GCUACCAUAGGCACCACGAG                                                                                                   |
| <i>vps-26</i>                        | KO crRNA#1                       | ACAAUAAAUUUCACAUUUAC                                                                                                   |
| <i>vps-26</i>                        | KO crRNA#2                       | AUGGCGAUGCUUUUCGGCUU                                                                                                   |
| <i>vps-26</i>                        | C-terminal HA-tag crRNA          | GAAGAAUCAGAAUUAUCGUC                                                                                                   |
| <i>dpy-10</i> (Arribere et al, 2014) | <i>dyp-10(cn64)</i> repair oligo | CACTTGAACCTCAATACGGC<br>AAGATGAGAATGACTGGAAA<br>CCGTACCGCATGCGGTGCCTA<br>TGGTAGCGGAGCTTCACATGG<br>CTTCAGACCAACAGCCTAT  |
| <i>vps-26</i>                        | KO repair oligo                  | GTTTATTTTCTGGAAAATAA<br>ACAATAAATTTACATTTAC<br>TAAGTAGCCAATCAGCAGAA<br>ATTCAAATTCGGCTCTCAAAT<br>GAGGAT                 |
| <i>vps-26</i>                        | HA repair oligo                  | AATCGCCAAGATCGGATCCA<br>AAAAGTGGATCAACAAGTCC<br>TGATGACAACAGTGACAGTA<br>GTTACCCATATGATGTTCCAG<br>ATTACGCTTAGAGATAGAGAT |

|                      |                       |                                  |
|----------------------|-----------------------|----------------------------------|
|                      |                       | AGTATTTTCGATGCAATTAAAT<br>CATTTT |
| <b><i>vps-26</i></b> | KO screening primer 1 | CCTTGGGATGAAGCAGTTCC             |
| <b><i>vps-26</i></b> | KO screening primer 2 | TCCAGTAACTGATTCTCCATC            |
| <b><i>vps-26</i></b> | HA screening primer 1 | GGAAGTAACTCTCTGGCGAA             |
| <b><i>vps-26</i></b> | HA screening primer 2 | GAGAAACAAAACAAACGGGG             |



**Table S3.**

| <b>Antibodies</b>                 | <b>Host</b> | <b>Manufacturer</b>          | <b>Catalogue#</b> | <b>Application</b> | <b>Dilution</b>           |
|-----------------------------------|-------------|------------------------------|-------------------|--------------------|---------------------------|
| <b>Acetylated-tubulin</b>         | Mouse       | Sigma                        | T7451             | IF                 | 1:100                     |
| <b>Acetylated-tubulin</b>         | Rabbit      | Cell signaling               | 5335              | IF                 | 1:100                     |
| <b>Alpha tubulin</b>              | Mouse       | Santa Cruz Biotechnology     | sc-32293          | IB, IF             | 1:200                     |
| <b>CP110</b>                      | Rabbit      | Protein Tech                 | 12794-1-AP        | IF, IB,IP          | 1:200 (IF)<br>1:2000(IB)  |
| <b>Myosin Va</b>                  | Rabbit      | Novus                        | NBP1-92156        | IF                 | 1:500                     |
| <b>GFP</b>                        | Mouse       | Roche                        | 1184460001        | IF                 | 1:200                     |
| <b>GFP</b>                        | Rabbit      | Pierce                       | PA1-980-A         | IP                 |                           |
| <b>HA</b>                         | Rabbit      | Cell Signaling               | 3724S             | IB, IF             | 1:1000                    |
| <b>Actin</b>                      | Mouse       | Novus                        | NB600-535         | IB                 | 1:5000                    |
| <b>MICAL-L1</b>                   | Mouse       | Novus                        | H00085377-B01P    | IF                 | 1:200                     |
| <b>MICAL-L1</b>                   | Rabbit      | LifeTein                     | RB1794            | IB                 | 1:1000                    |
| <b>GAPDH-HRP</b>                  | Mouse       | Protein Tech                 | HRP60004          | IB                 | 1:2000                    |
| <b>VPS26</b>                      | Rabbit      | Abcam                        | Ab23892           | IB                 | 1:1000                    |
| <b>VPS35</b>                      | Rabbit      | Abcam                        | Ab157220          | IF,IB              | 1:200 (IF)<br>1:1000 (IB) |
| <b>SNX1</b>                       | Rabbit      | Novus                        | NBP2-13359        | IF, IB             | 1:200 (IF)<br>1:500       |
| <b>SNX2</b>                       | mouse       | BD Transduction Laboratories | 611308            | IF, IB             | 1:200 (IF)<br>1:500       |
| <b>SNX5</b>                       | Rabbit      | Abcam                        | Ab180520          | IB                 | 1:500                     |
| <b>SNX27</b>                      | Mouse       | Abcam                        | Ab77799           | IB                 | 1:800                     |
| <b>Mouse HRP light chain only</b> | Goat        | Jackson                      | 115-035-174       | IB                 | 1:7000                    |
| <b>Rabbit HRP</b>                 | Donkey      |                              |                   | IB                 | 1:5000                    |
| <b>Mouse IRDye 680 RD</b>         | Goat        | LI-COR                       | 926-68070         | IB                 | 1:14000                   |
| <b>Rabbit IRDye 800CW</b>         | Donkey      | LI-COR                       | 926-32213         | IB                 | 1:14000                   |

|                         |               |                        |                |           |               |
|-------------------------|---------------|------------------------|----------------|-----------|---------------|
| <b>Mouse Alexa 488</b>  | <b>Goat</b>   | <b>Molecular Probe</b> | <b>A11029</b>  | <b>IF</b> | <b>1:500</b>  |
| <b>Rabbit Alexa 568</b> | <b>Goat</b>   | <b>Molecular Probe</b> | <b>A11036</b>  | <b>IF</b> | <b>1:500</b>  |
| <b>Mouse Alexa 568</b>  | <b>Rabbit</b> | <b>Molecular Probe</b> | <b>A11061</b>  | <b>IF</b> | <b>1:500</b>  |
| <b>RabbitAlexa488</b>   | <b>Goat</b>   | <b>Molecular Probe</b> | <b>A11034</b>  | <b>IF</b> | <b>1:500</b>  |
| <b>Mouse Alexa 568</b>  | <b>Goat</b>   | <b>Thermo Fisher</b>   | <b>A-11004</b> | <b>IF</b> | <b>1:1000</b> |
| <b>Rabbit Alexa 488</b> | <b>Goat</b>   | <b>Thermo Fisher</b>   | <b>A-11034</b> | <b>IF</b> | <b>1:1000</b> |
